# Supplementary material for: Perspectives of Healthcare Managers, Policymakers, and Financial Experts on the Effectiveness of Asset Leasing in Enhancing Tertiary Healthcare Quality in Kenya
Source: Research Square preprint supplement (doi:10.21203/rs.3.rs-6939933/v1), 2025-07-18
Supplement: Supplementary file 1 [file 18030a98b484e54f1896283c.docx]

**APPENDIX 1: INTERVIEW GUIDE**

**STUDY TITLE:**

**Perspectives of healthcare managers, policymakers, and financial experts on the effectiveness of asset leasing in enhancing tertiary healthcare quality in Kenya**

Interview guide for the study respondents, the following interviewees:

1. Senior hospital managers
2. Ministry of Health policymakers
3. National Treasury policymakers
4. Social Health Investor’ financing experts
5. **GENERAL INFORMATION - DEMOGRAPHIC**

| **Demographic information** |  |
| --- | --- |
| Age (In years) | 25 – 35 [1] 36 – 45 [2] 46 -55 [ 3]  56 – 65 [4] Above 65 years [5] |
| Gender | Male [1] Female [2] |
| Educational Level | Diploma [1] Undergraduate [2] Master [3] PhD [4] |
| Period of service (In years) | Below 1[1] 1 – 5 [2] 6 – 10 [3] 11 -15 [4] Above 15 [5] |
| What's your role in this organization |  |

1. **INNOVATIVE HEALTHCARE FINANCING MECHANISMS FOR TERTIARY HOSPITALS**

***Definition:****Non-traditional innovative mechanisms of raising financial resources through effective collaboration and public-private partnership with the private sector and other partners in health, such as asset/equipment leasing financing (ALF)*

**ASSET/EQUIPMENT LEASE FINANCING MECHANISM**

***Definition:*** *A medium-term financing mechanism for the procurement of machinery, equipment, vehicles, and/or properties by healthcare institutions. Lessors e.g purchase the equipment, usually as selected by the lessee, providing the equipment for a set period of time to hospitals and payment is affected at agreed terms – usually over time.*

1. How do you perceive the tertiary hospitals Asset leasing financing mechanism with regard to the Asset lease financing mechanism with regard to Lease Premiums, Equipment (asset) utilization and Equipment (Asset) Maintenance costs

………………………………………………………………………………………………………………………………………………………………………………………………………………………………………………………………………………………………………………………………………………………………………………………………………………………………………………………………………………………………………………………………………

1. How do you perceive the impact of leasing financing medical equipment (vs. purchasing) on the overall quality of healthcare provided at Kenya’s tertiary Hospitals?

………………………………………………………………………………………………………………………………………………………………………………………………………………………………………………………………………………………………………………………………………………………………………………………………………………………………………………………………………………………………………………………………………

1. What are the challenges associated with leasing financing medical equipment for healthcare services in Kenya's tertiary Hospitals?

………………………………………………………………………………………………………………………………………………………………………………………………………………………………………………………………………………………………………………………………………………………………………………………………………………………………………………………………………………………………………………………………………

1. How would you describe the relationship between the cost of lease premiums and the quality-of-care patients receives in Kenya's tertiary Hospitals?

………………………………………………………………………………………………………………………………………………………………………………………………………………………………………………………………………………………………………………………………………………………………………………………………………………………………………………………………………………………………………………………………………

1. How can the leasing financing mechanism be improved to better support healthcare providers in delivering high-quality services?

………………………………………………………………………………………………………………………………………………………………………………………………………………………………………………………………………………………………………………………………………………………………………………………………………………………………………………………………………………………………………………………………………
